# Supplementary material for: A new temperature–photoperiod coupled phenology module in LPJ-GUESS model v4.1: optimizing estimation of terrestrial carbon and water processes
Source: Copernicus journal article supplement (doi:10.5194/gmd-17-2509-2024), 2024-04-04
Supplement: Supplementary file 1 [file gmd-17-2509-2024-supplement.pdf]

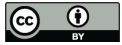

*Supplement of*

## **A new temperature–photoperiod coupled phenology module in LPJ-GUESS model v4.1: optimizing estimation of terrestrial carbon and water processes**

**Shouzhi Chen et al.**

*Correspondence to:* Yongshuo H. Fu ([yfu@bnu.edu.cn](mailto:yfu@bnu.edu.cn)) and Jing Tang ([jing.tang@bio.ku.dk](mailto:jing.tang@bio.ku.dk))

The copyright of individual parts of the supplement might differ from the article licence.

1 **Supplementary information**

2 **Figure S1 vegetation phenology based on remote sensing.** (a) Spring phenology, (b)  
3 autumn phenology, (c) the change trend of spring phenology (SOS), and (d) the change  
4 trend of autumn phenology. The dots represent regions with significant change trend.  
5

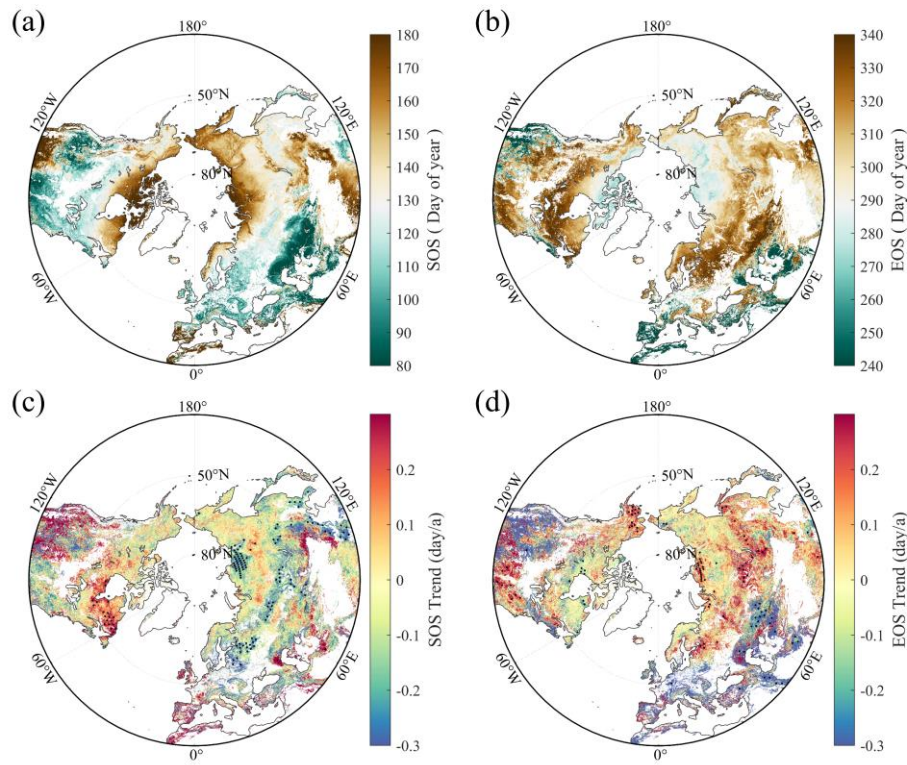

6 **Figure S2 Plant function type fraction at 0.5° spatial resolution.** (a) IBS, (b)  
7 TeBS, (c) BNS and (d) Shrubs.  
8

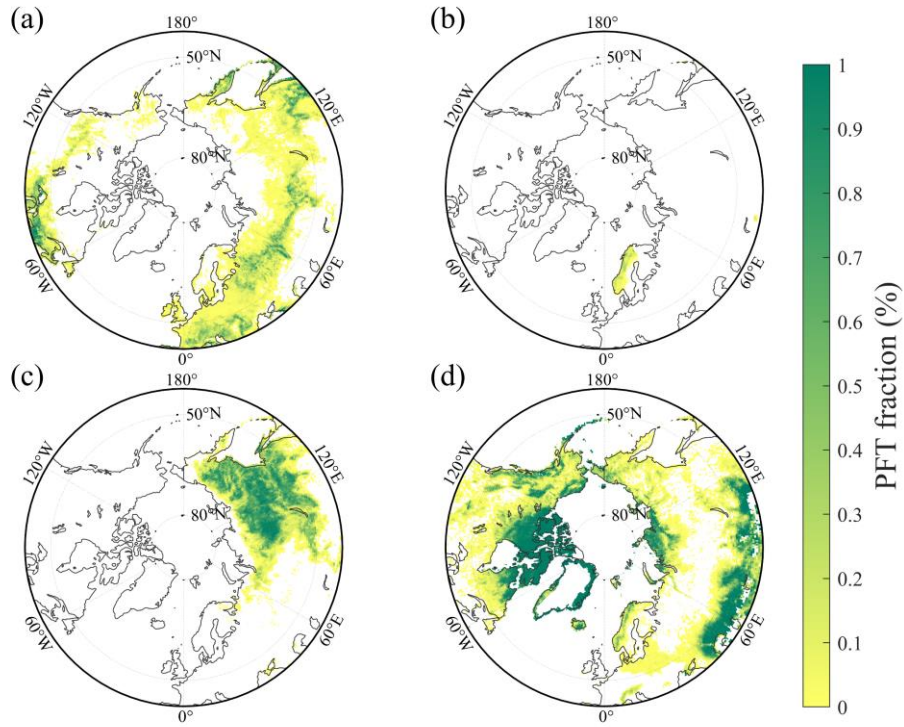

9 **Figure S3 Potential nature plant distribution simulated by LPJ-GUESS during**  
 10 **1979-2015. (a) Simulation with original phenological module, (b) simulation with**  
 11 **extended phenological module.**

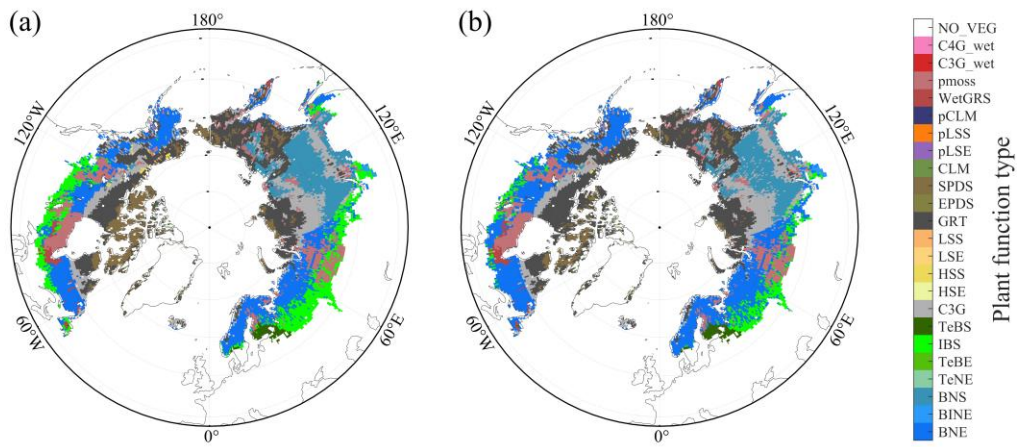

12

13 **Figure S4 Daily leaf area index simulation performance of LPJ-GUESS model**  
14 **using original and extended phenological module.**

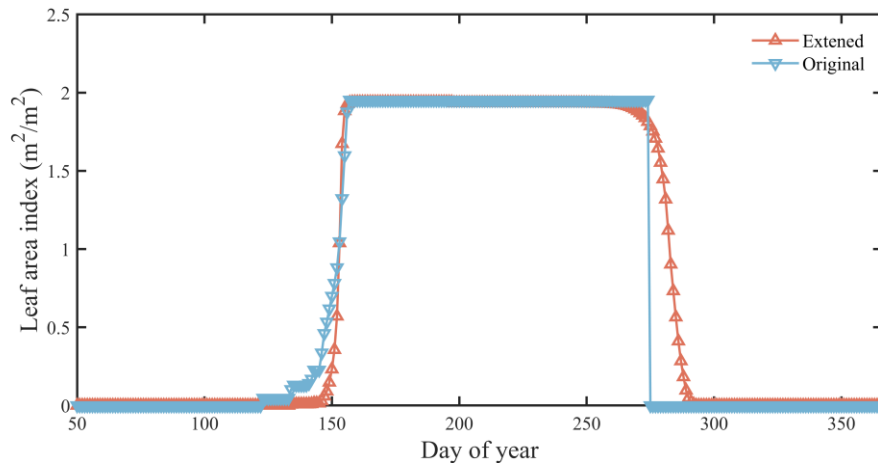

15  
16

17 **Figure S5 Frequency distributions of Spring (March to May) and Autumn (August**  
 18 **to November) gross primary productivity (GPP) of LPJ-GUESS simulation and**  
 19 **VPM product. (a-c) Spring GPP for BNS, IBS&TeBS and Shrubs dominant regions.**  
 20 **(d-f) Autumn GPP for BNS, IBS&TeBS and Shrubs dominant regions.**

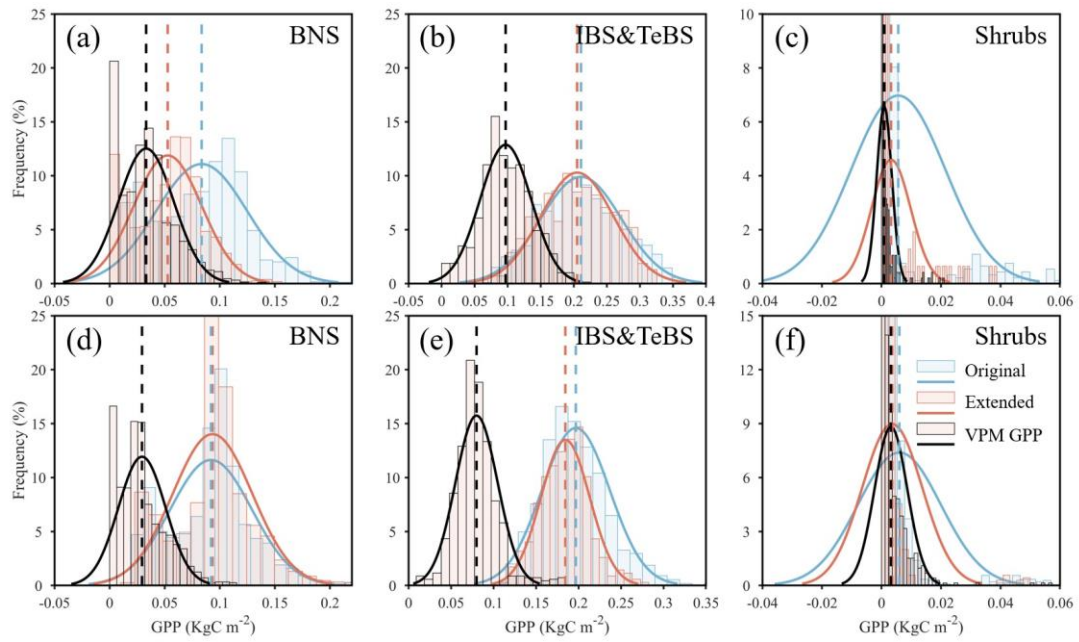

21  
 22

23 **Figure S6 Spatial distributions of Spring (March to May) and Autumn (August**  
24 **to November) gross primary productivity (GPP) of LPJ-GUESS simulation and**  
25 **VPM GPP data. (a-c) Spring GPP with original, extended LPJ-GUESS and VPM**  
26 **data. (d-f) Autumn GPP with original, extended LPJ-GUESS and VPM data.**

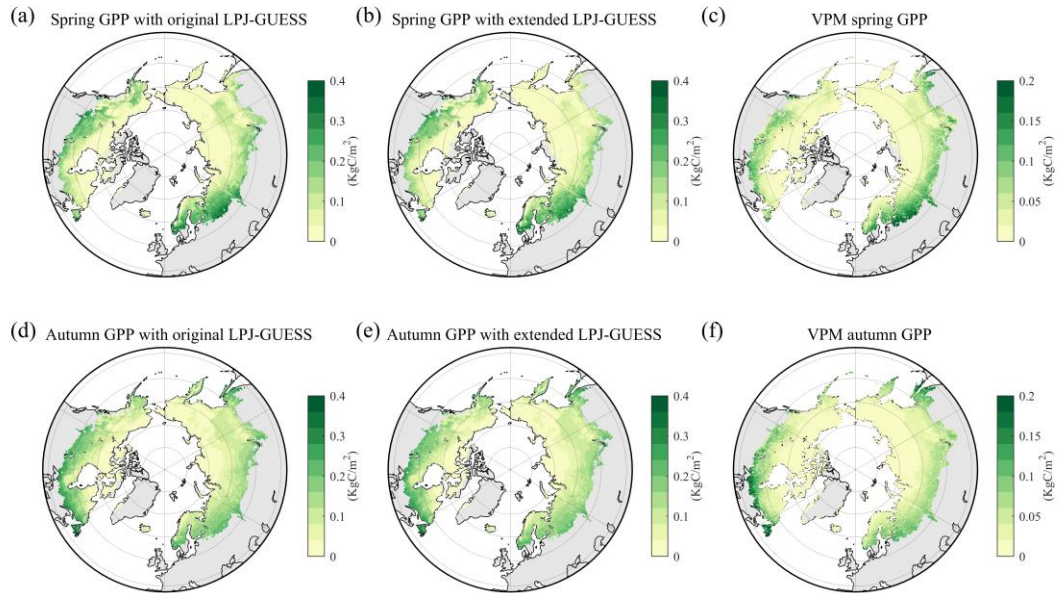

27  
28

29 **Figure S7 Spatial distributions of Spring (March to May) and Autumn (August**  
30 **to November) actual evapotranspiration (ART) of LPJ-GUESS simulation and**  
31 **REA ET data. (a-c) Spring AET with original, extended LPJ-GUESS and REA ET**  
32 **data. (d-f) Autumn AET with original, extended LPJ-GUESS and REA ET data.**

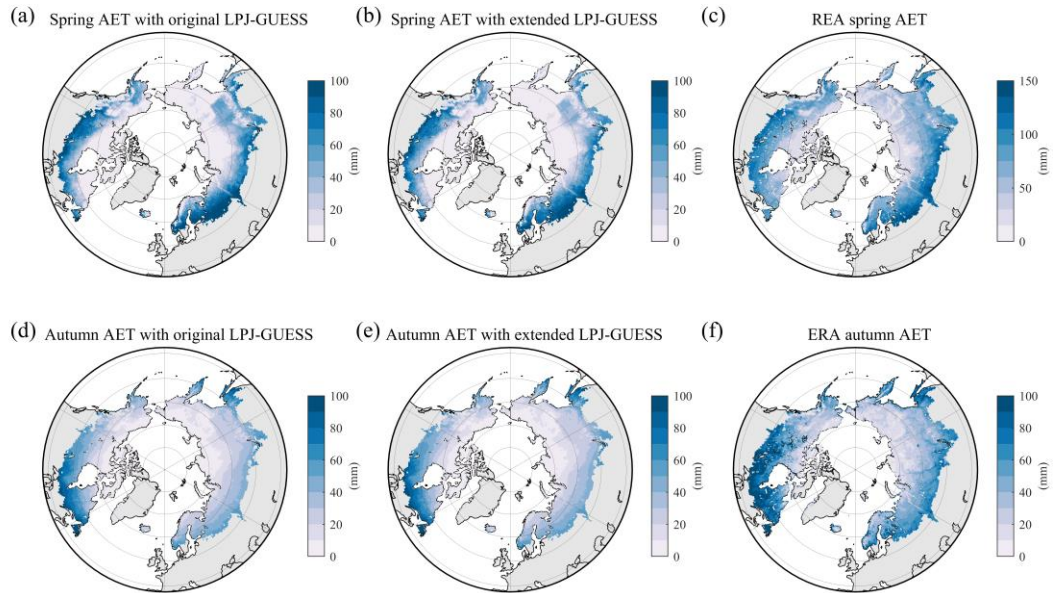

33



34 **Table S1 DORMPHOT model parameters.**

| Plant function type | DLcrit | Dcrit   | Ccrit   | Fcrit   | aD     | bD       | aC     | cC       | dF     | gT     | hDL    |
|---------------------|--------|---------|---------|---------|--------|----------|--------|----------|--------|--------|--------|
| Range               | [0,24] | [0,100] | [0,200] | [0,200] | [-1,1] | [-30,30] | [-1,1] | [-30,30] | [-1,1] | [0,30] | [0,30] |
| BNS                 | 13.38  | 37.03   | 147.45  | 14.38   | 0.02   | -11.84   | -0.18  | 14.43    | -0.28  | 7.86   | 17.57  |
| IBS&TeBS            | 17.37  | 49.57   | 133.08  | 27.78   | -0.05  | -7.00    | -0.11  | 10.62    | -0.40  | 19.53  | 16.45  |
| Shrubs              | 10.74  | 90.11   | 107.31  | 21.20   | 0.31   | 10.71    | -0.36  | -6.12    | -0.26  | 17.38  | 16.40  |

35 BNS, boreal needle leaved summergreen tree, IBS, Shade-intolerant broadleaved  
 36 summergreen tree, TeBS, shade-tolerant temperate broadleaved summergreen tree and  
 37 Shrubs, summergreen shrubs plant function types.

38

39 **Table S2 DM model parameters.**

| Plant function type | Tb       | Pstart | Ycrit     | x      | y      | porn |
|---------------------|----------|--------|-----------|--------|--------|------|
| Range               | [-40,40] | [0,24] | [0,50000] | [-3,3] | [-3,3] | 0,1  |
| BNS                 | 22.21    | 22.24  | 5365.79   | 2.15   | 3.09   | 0    |
| IBS&TeBS            | 39.12    | 16.42  | 8015.66   | 1.29   | 0.53   | 1    |
| Shrubs              | 13.20    | 19.76  | 1380.31   | 1.59   | 1.03   | 0    |

40 BNS, boreal needle leaved summergreen tree, IBS, Shade-intolerant broadleaved  
 41 summergreen tree, TeBS, shade-tolerant temperate broadleaved summergreen tree and  
 42 Shrubs, summergreen shrubs plant function types).

43

44 **Table S3 Model performance of parameterized original phenological module in**  
 45 **LPJ-GUESS.**

| Plant function type | Parameters |         |       | Internal calibration |      |       | External calibration |      |       |
|---------------------|------------|---------|-------|----------------------|------|-------|----------------------|------|-------|
|                     | a          | b       | k     | R <sup>2</sup>       | NSE  | RMSE  | R <sup>2</sup>       | NSE  | RMSE  |
| BNS                 |            |         |       | 0.52                 | 0.35 | 9.07  | 0.50                 | 0.29 | 9.64  |
| IBS&TeBS            | 0.00       | 1515.08 | 0.021 | 0.41                 | 0.36 | 11.85 | 0.41                 | 0.33 | 12.03 |
| Shrub               |            |         |       | 0.42                 | 0.31 | 12.61 | 0.44                 | 0.27 | 13.06 |
| BNS                 | 0.00       | 1649.60 | 0.024 | 0.50                 | 0.42 | 8.63  | 0.50                 | 0.40 | 8.91  |
| IBS&TeBS            | 0.00       | 105.62  | 0.005 | 0.56                 | 0.44 | 11.02 | 0.54                 | 0.37 | 11.61 |
| Shrub               | 0.00       | 1657.27 | 0.018 | 0.40                 | 0.36 | 12.11 | 0.41                 | 0.33 | 12.49 |

46 R<sup>2</sup>, coefficient of determination, NSE, Nash–Sutcliffe Efficiency, RMSE, Root mean  
 47 square error. BNS, boreal needle leaved summergreen tree, IBS, Shade-intolerant  
 48 broadleaved summergreen tree, TeBS, shade-tolerant temperate broadleaved  
 49 summergreen tree and Shrubs, summergreen shrubs plant function types. As with Sykes  
 50 et al. (1996), the parameter a is fixed to 0.

51

52 **Reference**

53

54 Sykes, M. T., Prentice, I. C., and Cramer, W.: A bioclimatic model for the potential distributions of north  
 55 European tree species under present and future climates, *J. Biogeogr.*, 203-233, 1996.

56
